# Supplementary material for: The misuse of colour in science communication
Source: PubMed Central journal article supplement (PMC7595127; doi:10.1038/s41467-020-19160-7), 2020-10-28

# Scientific colour maps

A “scientific colour map” uses a methodology that prevents data distortion, offers intuitive colouring, and is accessible for people with colour-vision deficiencies. However, most scientists use colour maps that distort data through uneven colour gradients (e.g., rainbow):

- ✓ Intuitive
- ✓ Distortion free
- ✓ Inclusive
- ✓ Freely available

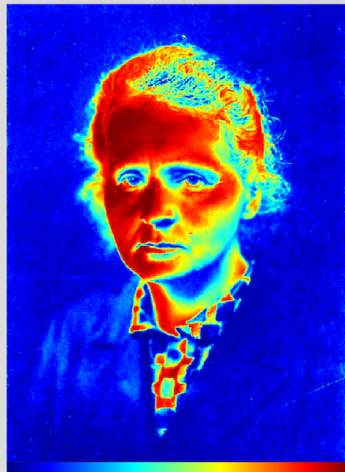

jet

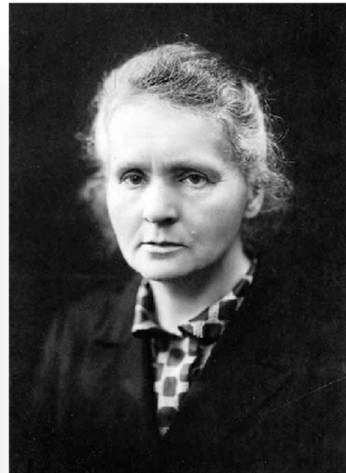

original

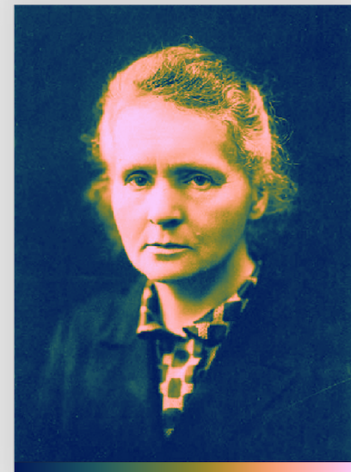

batlow

Scientific  
Colour Maps

Scientific  
Colour Maps

For every figure, think... is it scientific?

Your software... look beyond the default!

Your poster... accessible to the colour blind?

Your peers... say ‘no’ to rainbow!

*Variable*

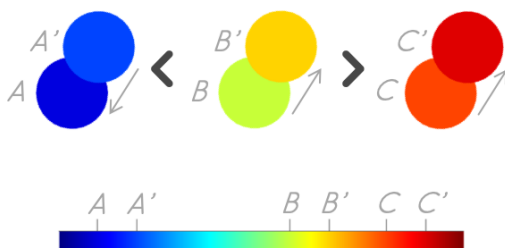

*Uniform*

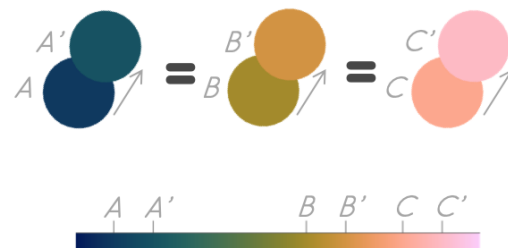

Incremental colour contrast

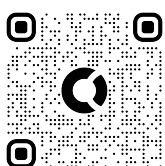

For maps and  
more

[www.fabiocramer.ch](http://www.fabiocramer.ch)

Download the  
paper

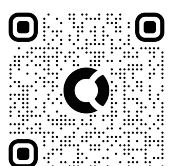

Supplement: 41467_2020_19160_MOESM3_ESM.pdf [file 41467_2020_19160_MOESM3_ESM.pdf]
